# Supplementary material for: Synthesis of poly(2-hydroxyethyl methacrylate) end-capped with asymmetric functional groups via atom transfer radical polymerization
Source: Royal Society of Chemistry journal article supplement (doi:10.1039/c3nj01398g), 2014-01-01
Supplement: c3nj01398g1.pdf [file c3nj01398g1.pdf]

**Materials are appeared on: New Journal of Chemistry**

## ***Supporting information for***

### **Synthesis of Poly(2-hydroxyethyl methacrylate) End-Capped with Asymmetric Functional Groups via Atom Transfer Radical Polymerization**

Chengmin Hou,<sup>a,b</sup> Shudong Lin,<sup>a,b</sup> Feng Liu,<sup>a,b</sup> Jiwen Hu,<sup>a,b\*</sup> Ganwei Zhang,<sup>a,b</sup>

Guojun Liu,<sup>a,c</sup> Yuanyuan Tu,<sup>a,b</sup> Hailiang Zou,<sup>a,b</sup> Hongsheng Luo<sup>a,b</sup>

<sup>a</sup>Guangzhou Institute of Chemistry, Chinese Academy of Sciences, Guangzhou, P. R. China,

510650; <sup>b</sup>Key Laboratory of Cellulose Lignocellulosics Chemistry, University of Chinese

Academy of Sciences, P. R. China, 510650; <sup>c</sup>Department of Chemistry, Queen's University, 90

Bader Lane, Kingston, Ontario, Canada K7L 3N6.

#### **The solubility of CuCl<sub>2</sub>/bpy Complex**

CuCl<sub>2</sub> (5 mg) and bpy (30 mg) catalyst complexes were mixed with 1 mL of methanol, methanol/2-butanone (m/m=3:2, 2:3, or 1:4) or 2-butanone, and 300 uL of these dissolved sample was diluted with 3 mL of corresponding solvent mixture. The solubility of these complexes was evaluated with UV-vis spectroscope by comparing ultraviolet absorption intensity of these diluted samples.

#### **The solubility of PHEMA Polymer**

PHEMA with DP of 80 and 800 (0.1 g) was dispersed in 1 mL of methanol, methanol/2-butanone (m/m=3:2 and 2:3) or 2-butanone under shaking once in a while over 24 h at room temperature. The solubility of PHEMA in these solvents was directly evaluated.

#### **Evaluation of Polymerization Degree (DP) of PHEMA Samples**

As shown in Fig. S2, monomer conversion was calculated by  $conv. = 2 * (\delta_{4.34} / 2 - \delta_{5.58}) / \delta_{4.34} \times 100\%$ , the polymerization degree of was calculated by  $DP = 2 * (\delta_{4.34} / 2 - \delta_{5.58}) / \delta_{4.67}$  and molecular weight from <sup>1</sup>H NMR spectra was obtained by  $M_{n,NMR} = 130.14 * DP + M_{initiator}$ .

---

\*Corresponding author, e-mail: [hjw@gic.ac.cn](mailto:hjw@gic.ac.cn), Fax: 011-86-020-85232307, Phone: 86-020-85232307.

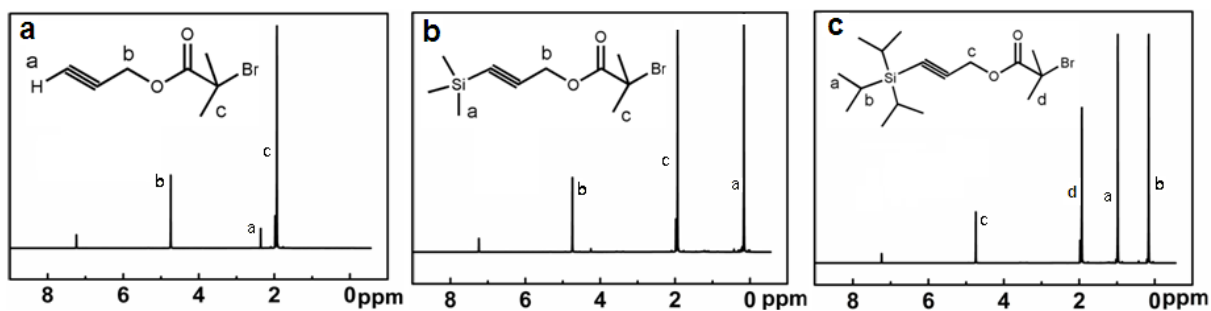

**Fig. S1**  $^1\text{H}$  NMR spectra of a) propargyl 2-bromoisobutyrate (PBiB), b) 3-(trimethylsilyl)propargyl 2-bromoisobutyrate (TMSPBiB), and c) 3-(triisopropylsilyl)propargyl 2-bromoisobutyrate (TiPSPBiB).

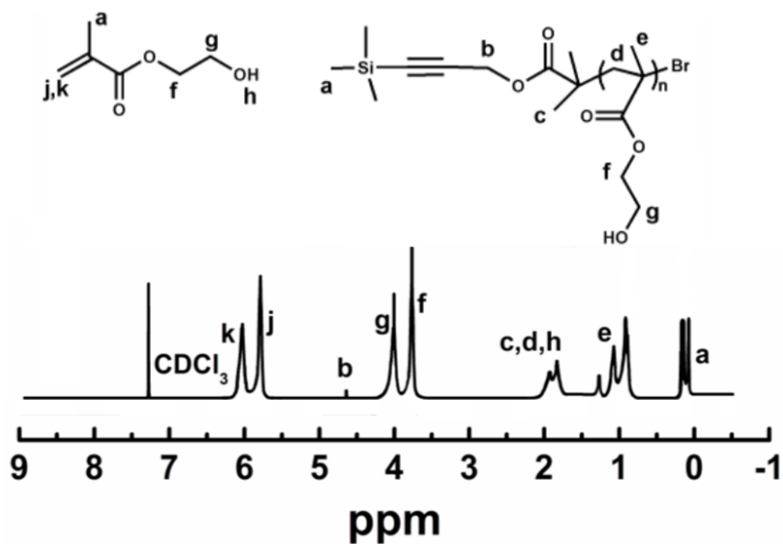

**Fig. S2**  $^1\text{H}$  NMR spectra of unpurified PHEMA with peaks assignment.

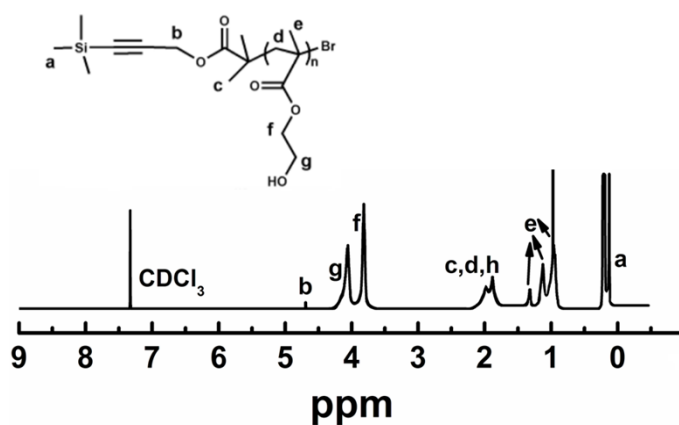

**Fig. S3**  $^1\text{H}$  NMR spectra of purified PHEMA.

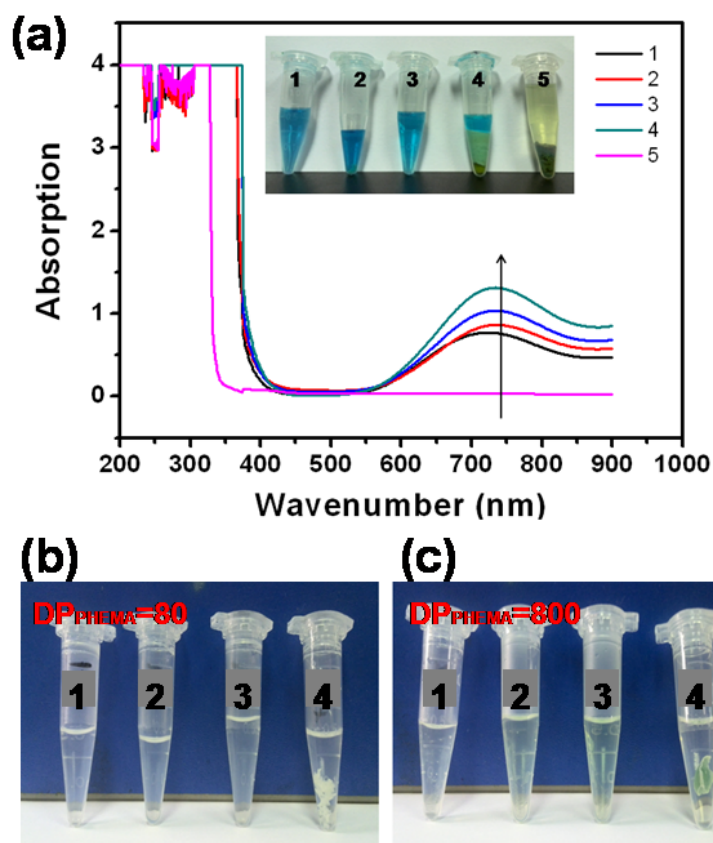

**Fig. S4** the solubility of a)  $\text{CuCl}_2/\text{bpy}$  in methanol (sample 1), methanol/2-butanone at 3:2 (sample 2), methanol/2-butanone at 2:3 (sample 3), methanol/2-butanone at 1:4 (sample 4) and 2-butanone (sample 5); the solubility of PHEMA with molecular weight of b) 10400 g/mol and c) 104000 g/mol in methanol (sample 1), methanol/2-butanone at 3:2 (sample 2), methanol/2-butanone at 2:3 (sample 3), and 2-butanone (sample 4).

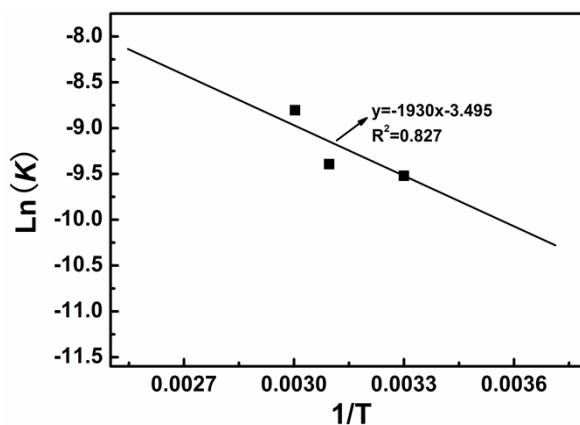

**Fig. S5.** The relationship of  $\ln(K_p^{app})$  and  $1/T$  based on Arrhenius equation.

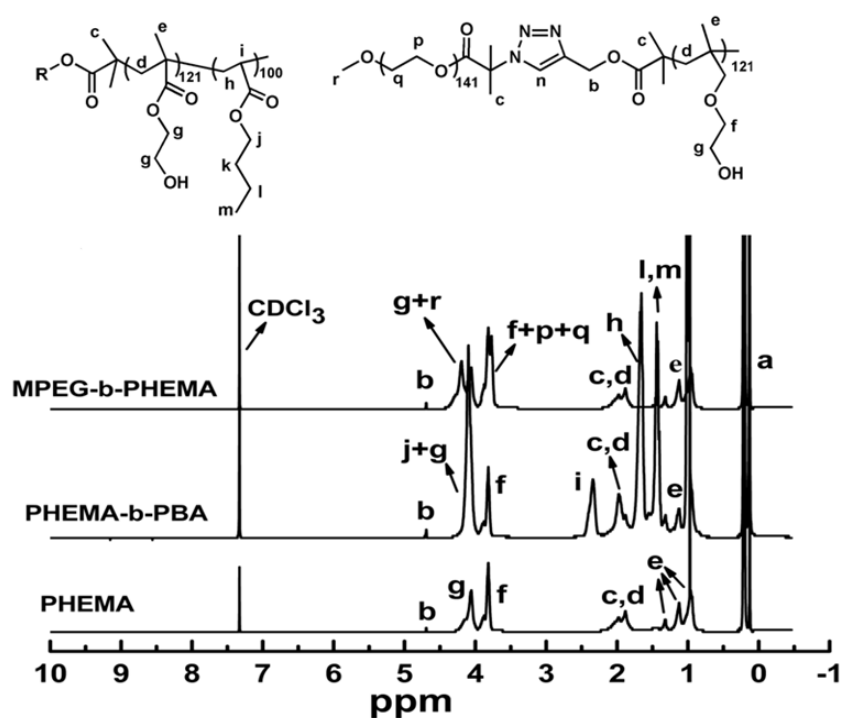

**Fig. S6** The  $^1\text{H}$  NMR spectra of purified TMS-C $\equiv$ C-PHEMA-Br and block copolymers PHEMA-*b*-PBA and MPEG-*b*-PHEMA.

**Table S1** The total solubility parameter ( $\delta$ ), dispersion solubility parameter ( $\delta_D$ ), hydrogen bonding solubility parameter ( $\delta_H$ ) and polar solubility parameter ( $\delta_p$ ) of methanol, methanol/2-butanone at 3:2, 2:3 and 1:4 (m/m) and 2-butanone with those of PHEMA polymer.

| $f_{\text{MEK}}/\%$ | $f_{\text{MeOH}}/\%$ | $\delta/(\text{cal}/\text{cm}^3)$ | $\delta_D/(\text{cal}/\text{cm}^3)$ | $\delta_p/(\text{cal}/\text{cm}^3)$ | $\delta_H/(\text{cal}/\text{cm}^3)$ |
|---------------------|----------------------|-----------------------------------|-------------------------------------|-------------------------------------|-------------------------------------|
|                     |                      | 1/2                               | 1/2                                 | 1/2                                 | 1/2                                 |
| 0                   | 100                  | 14.49                             | 7.42                                | 6                                   | 10.9                                |
| 40                  | 60                   | 12.402                            | 7.56                                | 5.36                                | 7.54                                |
| 60                  | 40                   | 11.358                            | 7.63                                | 5.04                                | 5.86                                |
| 80                  | 20                   | 10.314                            | 7.7                                 | 4.72                                | 4.18                                |
| 100                 | 0                    | 9.27                              | 7.77                                | 4.4                                 | 2.5                                 |
| PHEMA               |                      | 11.38                             | 7.75                                | 5.76                                | 7.22                                |
